# Supplementary material
Source: PubMed Central journal article supplement (PMC8727799)
Supplement: ajcr0011-5992-f8.pdf [file ajcr0011-5992-f8.pdf]

## Paracrine production of IL-6 promotes hypercoagulability in pancreatic cancer

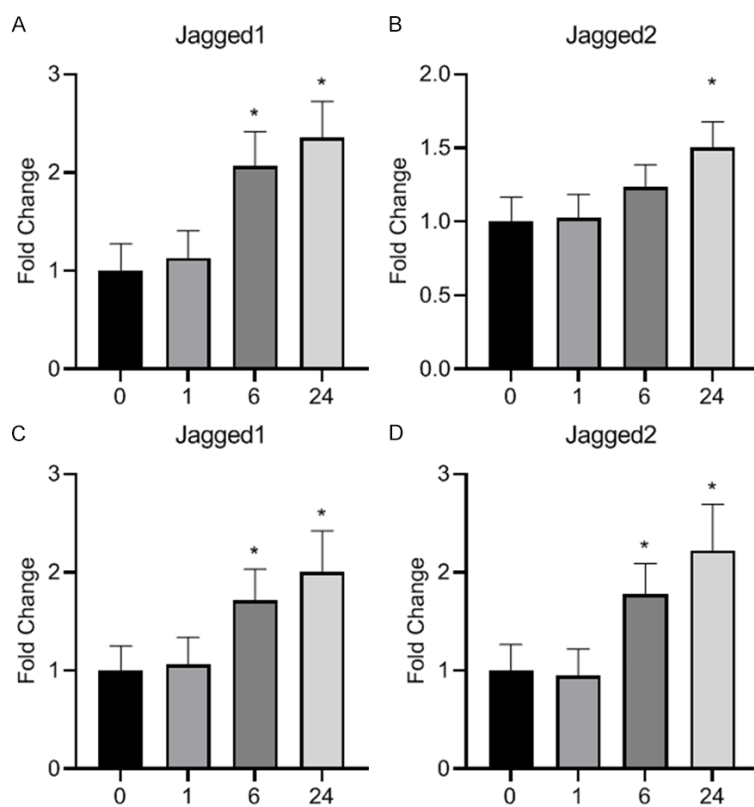

**Figure S1.** IL-6 could upregulate the Jagged-1/2 expression level in pancreatic cancer cells. (A-D) The PaTu-8988 (A, B) and PANC-1 (C, D) were treated with recombinant human IL-6 (rhIL-6, 100 ng/ml) for different times, and the relative expression level of Jagged-1/2 were analyzed by Image J. (\* $P < 0.05$ , \*\* $P < 0.01$ , \*\*\* $P < 0.001$  versus the control group).
